# Supplementary material
Source: publisher figshare collection journal article supplement (https://acs.figshare.com/ndownloader/files/4731421)
Supplement: Supplementary file 1 [file 4731421]

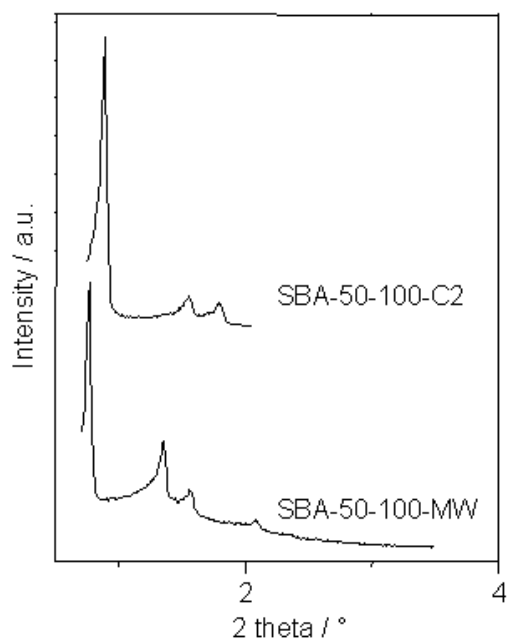

**Figure S1:** X-ray diffraction patterns of calcined SBA-15 (I, SBA-50-100-C2) and microwave digested SBA-15 (II, SBA-50-100-MW).

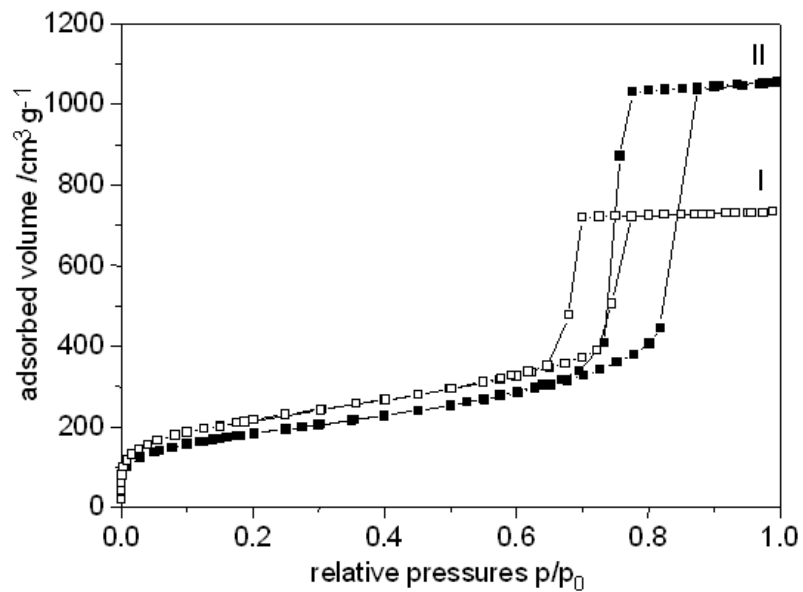

**Figure S2:** Nitrogen physisorption isotherms of calcined KIT-6 (I) and microwave digested KIT-6 (II).

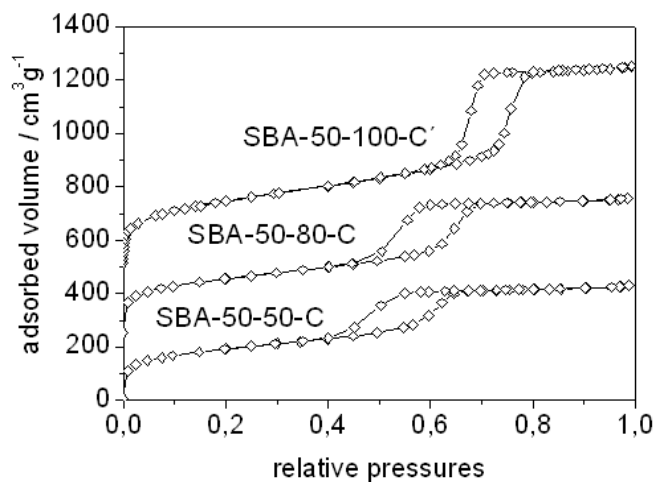

**Figure S3:** Nitrogen physisorption isotherms of calcined SBA-15 samples as a function of the temperature of hydrothermal treatment; for clarity sample SBA-50-80-C is given with an offset of  $250 \text{ cm}^3 \text{ g}^{-1}$  and sample SBA-50-100-C is given with an offset of  $500 \text{ cm}^3 \text{ g}^{-1}$ .

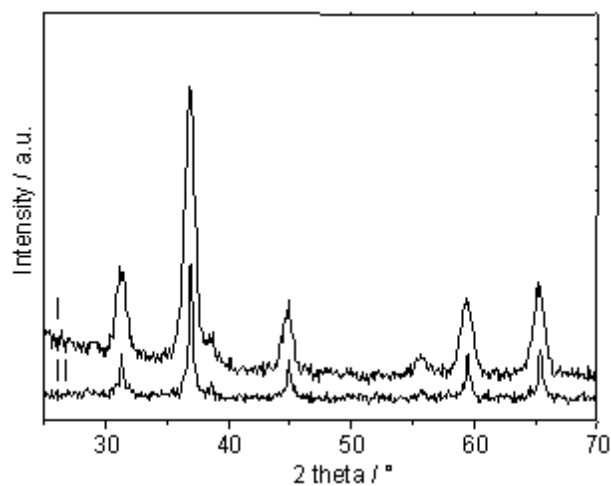

**Figure S4:** Wide angle XRD of  $\text{Co}(\text{NO}_3)_2 \cdot 6\text{H}_2\text{O}$  calcined at  $200^\circ\text{C}$  (I) and of a  $\text{Co}(\text{NO}_3)_2 \cdot 6\text{H}_2\text{O}$  / SBA-15 composite calcined at  $450^\circ\text{C}$ .

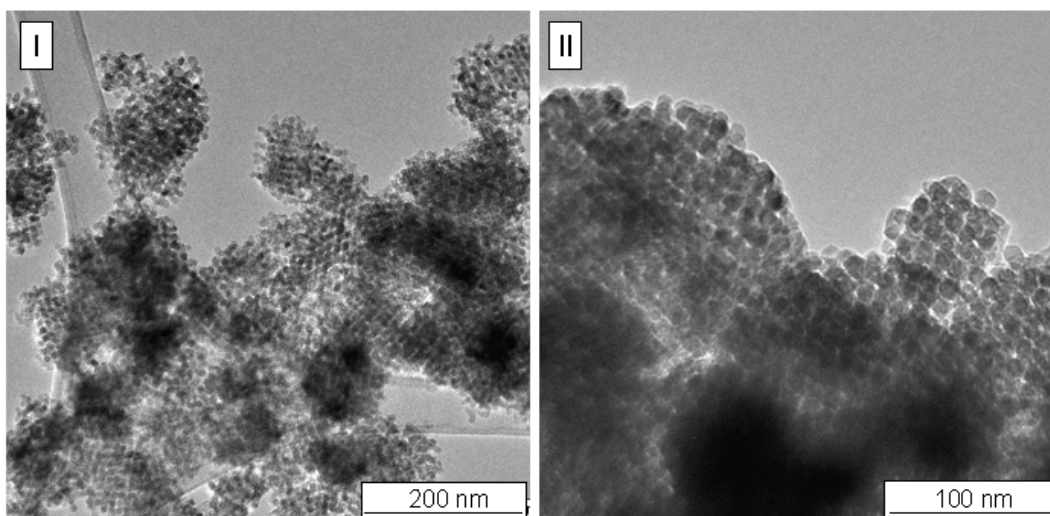

**Figure S5:** Effect of a size variation of microwave digested KIT-6 on the nanocast  $\text{Co}_3\text{O}_4$ ; TEM images of nanocast  $\text{Co}_3\text{O}_4$ : Co-Cubic-50-MW (I), Co-Cubic-135-MW (II).
